# Supplementary material
Source: MDPI journal article supplement (https://www.mdpi.com/2571-8789/7/2/57)
Supplement: s1 [file s1]

## Supplementary Material

**Table S1:** Basic soil characteristics of the site. Presented values are means of three soil profiles. Std. errors are presented in brackets (data adopted from Leinemann et al. [43]).

| Horizon | Depth<br>[cm] | Total N<br>[%] | Organic C<br>[%] | pH (CaCl <sub>2</sub> ) | Clay<br>[%] | Silt<br>[%]  | Sand<br>[%]  |
|---------|---------------|----------------|------------------|-------------------------|-------------|--------------|--------------|
| AE      | 0-10          | 0.06 (0.01)    | 1.51 (0.10)      | 3.19 (0.13)             | 2.13 (0.31) | 31.03 (1.63) | 66.84 (1.82) |
| Bsw     | 10-23         | 0.04 (0.01)    | 0.96 (0.15)      | 3.52 (0.21)             | 2.78 (0.60) | 32.71 (1.09) | 64.51 (1.51) |
| Bw      | 23-67         | 0.03 (0.00)    | 0.46 (0.11)      | 3.93 (0.03)             | 2.79 (0.22) | 35.13 (0.70) | 62.08 (0.92) |
| C       | 67-99         | 0.01 (0.00)    | 0.11 (0.03)      | 3.85 (0.14)             | 3.90 (0.99) | 33.28 (5.58) | 62.82 (6.54) |

**Table S2:** Mean enzyme activity change (acid phosphatase,  $\beta$ -glucosidase and chitinase) in percentage in non-hotspots over a 14-day incubation period and after water (control), substrate/nutrient addition. Presented values are means of three subsamples. Different letters within the same enzymes indicate significant ( $p < 0.05$ ) differences between depths. Std. errors are presented in brackets.

|                      | Control                   | DOC                        | Glucose                    | Ammonium<br>nitrate        | Glucose +<br>Ammonium<br>nitrate<br>[%] | Artificial root<br>exudate | Dipotassium<br>Phosphate  | Glucose +<br>Dipotassium<br>Phosphate |
|----------------------|---------------------------|----------------------------|----------------------------|----------------------------|-----------------------------------------|----------------------------|---------------------------|---------------------------------------|
| <i>Upper Subsoil</i> |                           |                            |                            |                            |                                         |                            |                           |                                       |
| pho                  | 70.4 <sup>a</sup> (38.2)  | 237.7 <sup>a</sup> (105.0) | 70.7 <sup>a</sup> (24.4)   | 179.1 <sup>a</sup> (57.3)  | 985.8 <sup>a</sup> (152.9)              | 87.3 <sup>a</sup> (8.5)    | 43.7 <sup>a</sup> (19.5)  | 76.9 <sup>a</sup> (26.4)              |
| $\beta$ glu          | 104.6 <sup>a</sup> (47.1) | 88.25 <sup>a</sup> (28.0)  | 147.4 <sup>a</sup> (32.2)  | 264.5 <sup>a</sup> (22.0)  | 405.6 <sup>a</sup> (79.6)               | 131.9 <sup>a</sup> (64.8)  | 73.2 <sup>a</sup> (11.0)  | 62.8 <sup>a</sup> (22.8)              |
| chi                  | 68.4 <sup>a</sup> (41.4)  | 101.0 <sup>a</sup> (24.7)  | 104.8 <sup>a</sup> (40.0)  | 161.1 <sup>a</sup> (11.0)  | 188.4 <sup>a</sup> (54.6)               | 158.0 <sup>a</sup> (54.3)  | 72.1 <sup>a</sup> (9.0)   | 75.8 <sup>a</sup> (14.5)              |
| <i>Lower Subsoil</i> |                           |                            |                            |                            |                                         |                            |                           |                                       |
| pho                  | 143.4 <sup>a</sup> (37.1) | 203.1 <sup>a</sup> (90.3)  | 174.1 <sup>a</sup> (90.3)  | 358.1 <sup>a</sup> (137.9) | 612.5 <sup>a</sup> (287.2)              | 267.5 <sup>a</sup> (61.8)  | 139.3 <sup>b</sup> (13.5) | 200.3 <sup>b</sup> (34.4)             |
| $\beta$ glu          | 157.9 <sup>a</sup> (21.1) | 223.7 <sup>b</sup> (104.5) | 261.7 <sup>a</sup> (104.5) | 407.5 <sup>a</sup> (51.2)  | 490.2 <sup>a</sup> (120.1)              | 403.3 <sup>a</sup> (116.0) | 202.0 <sup>b</sup> (39.5) | 490.2 <sup>b</sup> (120.1)            |
| chi                  | 202.0 <sup>a</sup> (37.4) | 158.5 <sup>a</sup> (69.3)  | 185.0 <sup>a</sup> (69.3)  | 216.9 <sup>a</sup> (31.4)  | 307.7 <sup>a</sup> (59.6)               | 364.2 <sup>b</sup> (50.0)  | 183.7 <sup>a</sup> (35.3) | 155.0 <sup>a</sup> (35.5)             |

**Table S3:** Mean enzyme activity change (acid phosphatase,  $\beta$ -glucosidase and chitinase) in percentage in hotspots over a 14-day incubation period and after water (control), substrate/nutrient addition. Presented values are means of three subsamples. Different letters within the same enzymes indicate significant ( $p < 0.05$ ) differences between depths. Std. errors are presented in brackets.

| Control              |                    |        | DOC                |        | Glucose            |         | Ammonium<br>nitrate |         | Glucose +<br>Ammonium<br>nitrate |         | Artificial root<br>exudate |        | Dipotassium<br>Phosphate |        | Glucose +<br>Dipotassium<br>Phosphate |        |
|----------------------|--------------------|--------|--------------------|--------|--------------------|---------|---------------------|---------|----------------------------------|---------|----------------------------|--------|--------------------------|--------|---------------------------------------|--------|
| [%]                  |                    |        |                    |        |                    |         |                     |         |                                  |         |                            |        |                          |        |                                       |        |
| <i>Upper Subsoil</i> |                    |        |                    |        |                    |         |                     |         |                                  |         |                            |        |                          |        |                                       |        |
| pho                  | -10.5 <sup>a</sup> | (24.8) | 84.2 <sup>a</sup>  | (50.5) | 9.8 <sup>a</sup>   | (17.4)  | 63.0 <sup>a</sup>   | (25.5)  | 358.8 <sup>a</sup>               | (28.7)  | 18.4 <sup>a</sup>          | (10.2) | -0.8 <sup>a</sup>        | (14.0) | 1.7 <sup>a</sup>                      | (5.0)  |
| βglu                 | 15.3 <sup>a</sup>  | (4.3)  | 32.8 <sup>a</sup>  | (16.7) | 39.6 <sup>a</sup>  | (32.9)  | 69.6 <sup>a</sup>   | (10.8)  | 153.1 <sup>a</sup>               | (54.2)  | 39.1 <sup>a</sup>          | (27.4) | 27.2 <sup>a</sup>        | (11.0) | 10.6 <sup>a</sup>                     | (6.0)  |
| chi                  | 4.2 <sup>a</sup>   | (5.7)  | 62.2 <sup>a</sup>  | (20.5) | 46.2 <sup>a</sup>  | (31.4)  | 54.7 <sup>a</sup>   | (13.8)  | 103.4 <sup>a</sup>               | (39.4)  | 63.9 <sup>a</sup>          | (21.3) | 34.4 <sup>a</sup>        | (9.8)  | 29.7 <sup>a</sup>                     | (1.4)  |
| <i>Lower Subsoil</i> |                    |        |                    |        |                    |         |                     |         |                                  |         |                            |        |                          |        |                                       |        |
| pho                  | 39.6 <sup>a</sup>  | (18.2) | 83.3 <sup>a</sup>  | (76.2) | 73.8 <sup>a</sup>  | (51.8)  | 127.2 <sup>a</sup>  | (43.9)  | 435.3 <sup>a</sup>               | (114.7) | 99.2 <sup>a</sup>          | (51.7) | 94.5 <sup>b</sup>        | (10.0) | 83.1 <sup>a</sup>                     | (29.9) |
| βglu                 | 60.0 <sup>a</sup>  | (47.1) | 102.3 <sup>a</sup> | (29.2) | 181.9 <sup>a</sup> | (101.5) | 228.1 <sup>a</sup>  | (102.4) | 413.5 <sup>a</sup>               | (112.6) | 182.5 <sup>a</sup>         | (63.2) | 139.1 <sup>b</sup>       | (33.7) | 120.1 <sup>b</sup>                    | (17.4) |
| chi                  | 87.7 <sup>a</sup>  | (41.4) | 83.3 <sup>a</sup>  | (39.2) | 104.5 <sup>a</sup> | (74.1)  | 83.9 <sup>a</sup>   | (21.2)  | 237.8 <sup>a</sup>               | (33.8)  | 210.9 <sup>a</sup>         | (80.9) | 168.8 <sup>b</sup>       | (39.9) | 102.3 <sup>a</sup>                    | (26.3) |

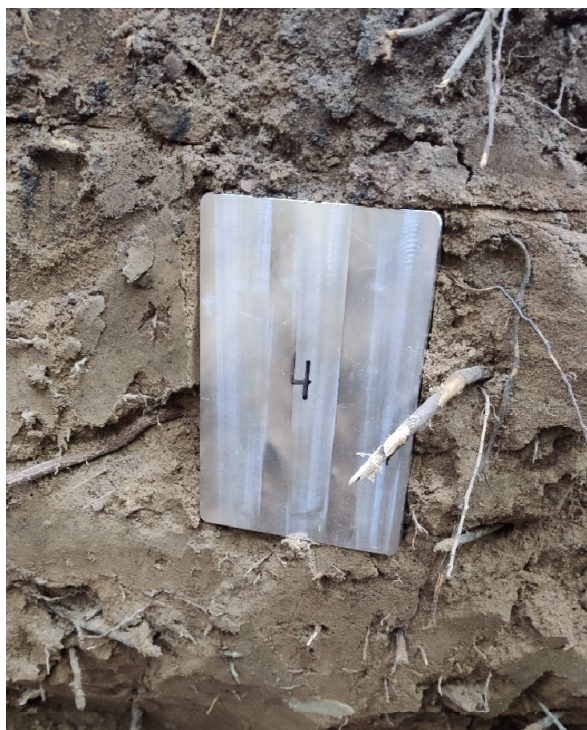

**Figure S1:** Sampling of an upper subsoil sample.

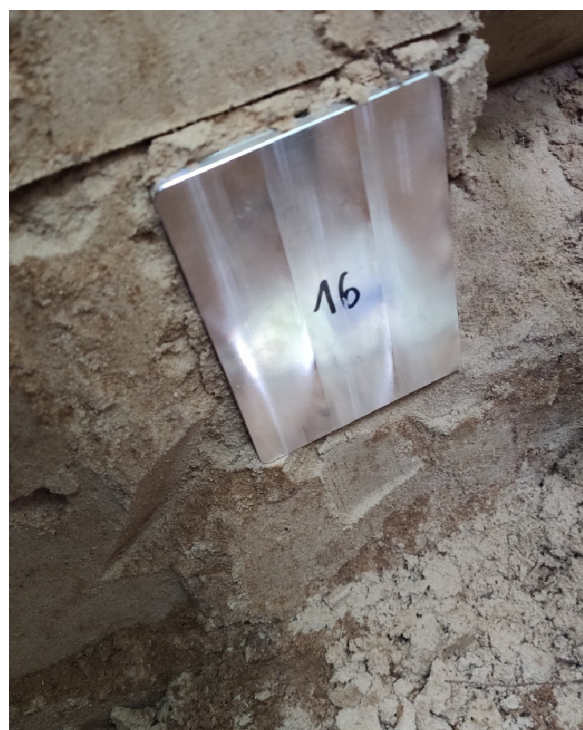

**Figure S2:** Sampling of a lower subsoil sample.

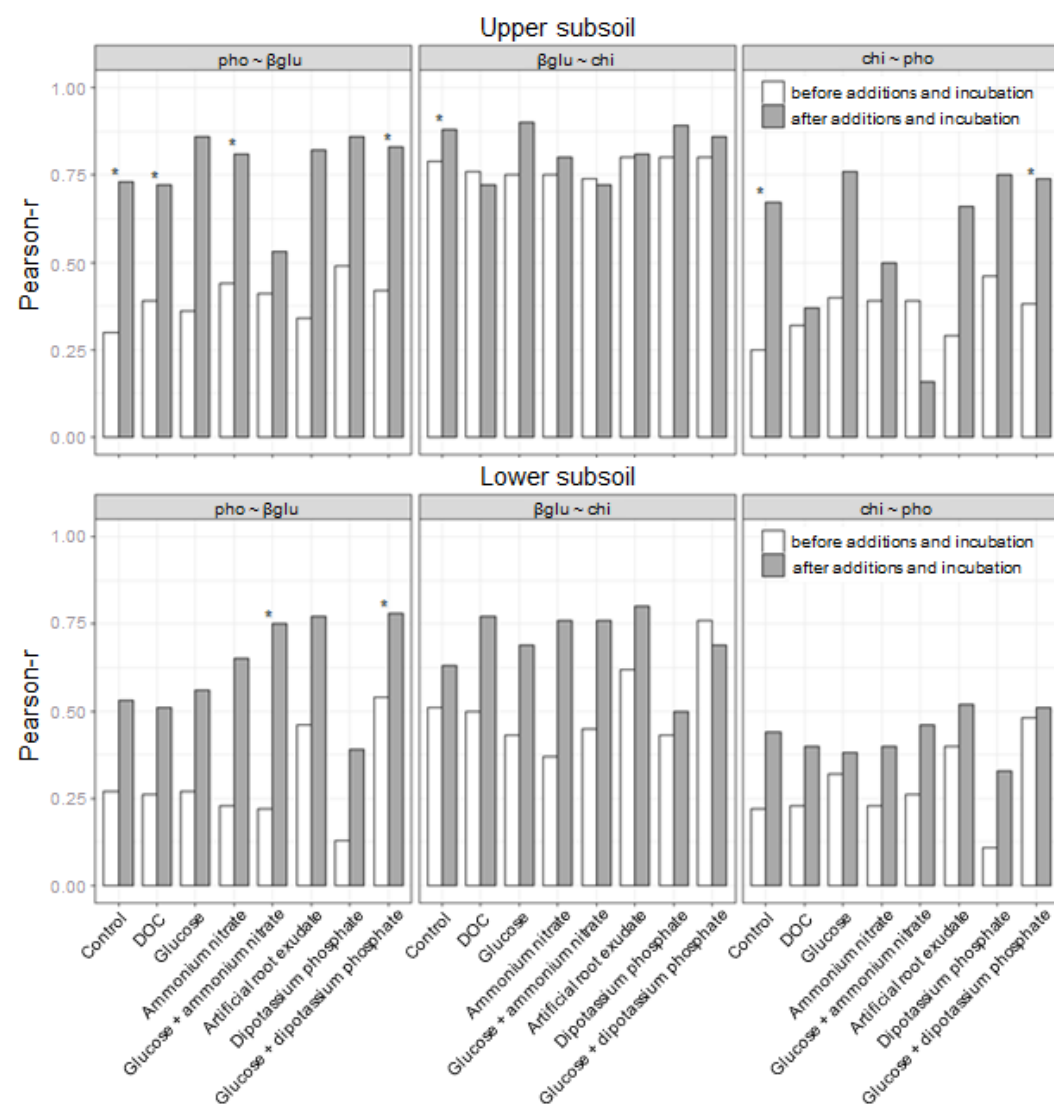

**Figure S3:** Pearson-r indicating pattern similarity in dependence of depth, treatment and enzyme combination. Bars show comparison of Pearson-r of untreated and treated subsamples. Presented values are means of three subsamples. Stars show significant differences of mean Pearson-r before and after addition ( $p < 0.05$ ).
